# Supplementary material for: NETosis and Nucleosome Biomarkers in Septic Shock and Critical COVID-19 Patients: An Observational Study
Source: MDPI journal article supplement (doi:10.3390/biom12081038), 2022-07-27

## Supplementary Material

### 1 Supplementary Figures and Tables

**Supplementary Table S1: Demography of the population.** Differences between the groups were assessed using a Chi-Square test.

|                                                      | Control<br>n=48 | COVID-19<br>n=22 | Sepsis<br>n=48 | p-value |
|------------------------------------------------------|-----------------|------------------|----------------|---------|
| Demographics                                         |                 |                  |                |         |
| Men – n (%)                                          | 26 (54)         | 15 (68)          | 24 (50)        | 0.36    |
| Women – n (%)                                        | 22 (46)         | 7 (32)           | 24 (50)        | 0.36    |
| Age, years – mean ± sd                               | 61.9±14.5       | 59.9±10.3        | 65.0±14.2      | 0.53    |
| Medical History                                      |                 |                  |                |         |
| Hypertension – n (%)                                 | 20 (42)         | 12 (56)          | 25 (52)        | 0.48    |
| BMI > 25 – n (%)                                     | 26 (58)         | 14 (74)          | 26 (54)        | 0.34    |
| Diabetes – n (%)                                     | 11 (23)         | 8 (36)           | 5 (10)         | 0.71    |
| History of smoking – n (%)                           | 10 (21)         | 1 (5)            | 15 (31)        | 0.04    |
| COPD – n (%)                                         | 4 (8)           | 3 (14)           | 5 (10)         | 0.75    |
| CKD – n (%)                                          | 9 (19)          | 0 (0)            | 10 (21)        | 0.07    |
| Cancer – n (%)                                       | 15 (31)         | 0 (0)            | 9 (19)         | 0.01    |
| Outcome                                              |                 |                  |                |         |
| 30-day mortality– n (%)                              | Not applicable  | 6 (27)           | 22 (46)        | 0.45    |
| ICU length of stay (days) – mean ± SD                |                 | 29±30            | 8±9            | <0.01   |
| Thromboembolic events – n (%)                        |                 | 6 (27)           | 4 (8)          | 0.06    |
| TIMI major bleeding events – n (%)†                  |                 | 5 (23)           | 1 (2)          | 0.01    |
| ICU admission                                        |                 |                  |                |         |
| Delays since symptoms (days) – mean ± SD             | Not applicable  | 7.3±3.2          | 2.6±2.4        | <0.01   |
| Routine laboratory testing                           |                 |                  |                |         |
| Highest CRP (mg/dL) – mean ± SD                      | Not reported    | 323±119          | 313±122        | 0.75    |
| Creatinine (mg/dL) – mean ± SD                       |                 | 0.91±0.59        | 2.19±1.91      | <0.0    |
| Hemoglobin (g/dL) – mean ± SD                        |                 | 11.62±1.90       | 10.34±2.05     | 0.02    |
| Lowest Lymphocytes (10 <sup>3</sup> /μL) – mean ± SD |                 | 484±335          | 469±310        | 0.86    |
| Organ failure and severity scores                    |                 |                  |                |         |
| PaO <sub>2</sub> /FiO <sub>2</sub> – mean ± SD       | Not applicable  | 103±37           | 225±119        | <0.01   |
| Ventilation duration (days) – mean ± SD              |                 | 27±24            | 4±7            | <0.01   |
| Norepinephrine (μg/kg/min) – mean ± SD               |                 | 0.049±0.105      | 0.330±0.350    | <0.01   |
| Norepinephrine duration (days) – mean ± SD           |                 | 1.2±3.4          | 4.8±6.1        | <0.01   |
| Renal replacement therapy – n (%)                    |                 | 1 (5)            | 13 (27)        | 0.04    |
| Apache II score – mean ± SD                          |                 | 15 ± 4           | 20 ± 7         | <0.01   |
| SOFA Score – mean ± SD                               |                 | 4 ± 1            | 9 ± 3          | <0.01   |
| SIC score – n (%)                                    |                 | 0 (0)            | 11 (24)        | 0.01    |
| DIC score – n (%)                                    |                 | 0 (0)            | 7 (16)         | 0.09    |

†Major bleeding complications have been defined according to the TIMI definition. All bleeding complications in COVID-19 group occurred in ECMO-treated patients.

**Abbreviations:** APACHE, acute physiology and chronic health evaluation; BMI, body mass index; COPD, chronic obstructive pulmonary disease; CKD, chronic kidney disease; CRP, C-reactive protein; DIC, disseminated intravascular coagulopathy; ICU, intensive care unit; PaO<sub>2</sub>/FiO<sub>2</sub>, arterial oxygen partial pressure/fractional inspired oxygen; SIC, sepsis-induced coagulopathy; SOFA, sepsis-related organ failure assessment; TIMI, Thrombolysis in Myocardial Infarction; VV ECMO, venovenous extracorporeal membrane oxygenation



**Supplementary Table S2: Summary of biomarkers data in controls, septic shock, and critical COVID-19 subjects.** Results are presented as the median (10<sup>th</sup> – 90<sup>th</sup> percentile) and the p-value represents the difference between sepsis and COVID-19 patients. Significant results appear in bold characters.

| Parameter                                                 |                                     | Median (10 <sup>th</sup> - 90 <sup>th</sup> percentile) |                           |                             | p-value <sup>‡</sup> |
|-----------------------------------------------------------|-------------------------------------|---------------------------------------------------------|---------------------------|-----------------------------|----------------------|
|                                                           |                                     | Control                                                 | Sepsis                    | COVID-19                    |                      |
| Circulating nucleosomes and neutrophil activation markers | [Nu.H3.1] ng/mL                     | <b>24.6 (12.2 - 61.7)</b>                               | <b>862 (253 - 9398)</b>   | <b>2533 (706 - 4389)</b>    | <b>0.0020</b>        |
|                                                           | [Nu.Cit-H3R8] ng/mL                 | 2.46 (1.02 - 7.07)                                      | 71.7 (15.6 - 357)         | 60.6 (20.8 - 207)           | 0.2519               |
|                                                           | [Cit-H3] ng/mL                      | 0.215 (0.0757 - 0.679)                                  | 2.82 (0.879 - 13.5)       | 2.96 (0.748 - 7.72)         | 0.3786               |
|                                                           | [MPO] ng/mL                         | 23.6 (11.9 - 47.5)                                      | 228 (72 - 2622)           | 327 (54.7 - 914)            | 0.6040               |
|                                                           | [NE] ng/mL                          | <b>7.57 (4.13 - 12.6)</b>                               | <b>102 (41.8 - 478)</b>   | <b>57.2 (20.4 - 178)</b>    | <b>0.0002</b>        |
| Pro-inflammatory                                          | [IL-1 $\beta$ ] pg/mL               | <b>4.00 (3.37 - 4.83)</b>                               | <b>3.71 (1.57 - 7.82)</b> | <b>6.74 (4.16 - 10.6)</b>   | <b>0.0010</b>        |
|                                                           | [IL-6] pg/mL                        | <b>1.88 (1.32 - 5.01)</b>                               | <b>467 (20.2 - 8199)</b>  | <b>32.6 (9.07 - 209)</b>    | <b>&lt;0.0001</b>    |
|                                                           | [IL-17] pg/mL                       | <b>24.3 (15.3 - 33.9)</b>                               | <b>22.9 (10.9 - 44.8)</b> | <b>38.6 (26.8 - 55.8)</b>   | <b>0.0074</b>        |
|                                                           | [IFN- $\gamma$ ] pg/mL              | <b>9.15 (3.62 - 18.6)</b>                               | <b>76.5 (12.1 - 249)</b>  | <b>36.3 (17.3 - 90.8)</b>   | <b>0.0053</b>        |
|                                                           | [sTREM-1] ng/mL                     | <b>90.7 (56.8 - 225)</b>                                | <b>450 (158 - 1126)</b>   | <b>174 (106 - 486)</b>      | <b>&lt;0.0001</b>    |
| Anti-inflammatory                                         | [IL-1ra] pg/mL                      | <b>117 (72.8 - 203)</b>                                 | <b>6697 (996 - 18154)</b> | <b>645 (235 - 4861)</b>     | <b>&lt;0.0001</b>    |
|                                                           | [IL-10] pg/mL                       | <b>4.29 (3.08 - 12.9)</b>                               | <b>18.8 (3.28 - 424)</b>  | <b>15 (9.68 - 26.8)</b>     | <b>0.0029</b>        |
|                                                           | [IL-13] pg/mL                       | <b>2.46 (1.3 - 5.65)</b>                                | <b>1.49 (1.36 - 3.8)</b>  | <b>4.99 (3.43 - 10.3)</b>   | <b>&lt;0.0001</b>    |
| Growth and differentiation factors                        | [FGF basic] pg/mL                   | 37.9 (27.2 - 47.6)                                      | 45.8 (26.4 - 71)          | 60.5 (41.8 - 89.6)          | 0.1286               |
|                                                           | [G-CSF] pg/mL                       | <b>69.4 (24.7 - 110)</b>                                | <b>268 (62.4 - 18047)</b> | <b>98.1 (71.3 - 169)</b>    | <b>&lt;0.0001</b>    |
|                                                           | [GM-CSF] pg/mL                      | 1.48 (1.48 - 6.34)                                      | 1.92 (1.56 - 3.55)        | 1.56 (1.48 - 5.66)          | 0.8451               |
|                                                           | [IL-2] pg/mL                        | <b>6.52 (6.52 - 13.8)</b>                               | <b>7.24 (7.04 - 19.1)</b> | <b>18.3 (9.3 - 33.5)</b>    | <b>0.0013</b>        |
|                                                           | [IL-4] pg/mL                        | 3.4 (2.33 - 4.44)                                       | 3.14 (1.64 - 4.74)        | 4.47 (3.25 - 6.08)          | <b>0.0441</b>        |
|                                                           | [IL-5] pg/mL                        | <b>80.3 (24.8 - 80.3)</b>                               | <b>20.7 (17.9 - 65.8)</b> | <b>37.9 (17.9 - 97.2)</b>   | <b>0.0130</b>        |
|                                                           | [IL-7] pg/mL                        | <b>42.3 (28.8 - 61.1)</b>                               | <b>36.7 (17.1 - 62.9)</b> | <b>69.1 (44 - 92.2)</b>     | <b>0.0005</b>        |
|                                                           | [IL-9] pg/mL                        | 298 (231 - 365)                                         | 178 (132 - 230)           | 226 (181 - 321)             | 0.1348               |
|                                                           | [IL-12 (p70)] pg/mL                 | 7.28 (7.28 - 7.68)                                      | 8 (7.48 - 12.4)           | 12.4 (3.52 - 23.7)          | 0.1822               |
|                                                           | [IL-15] pg/mL                       | 67.6 (67.6 - 77.9)                                      | 63.5 (58.2 - 63.5)        | 58.2 (58.2 - 103)           | 0.6641               |
|                                                           | [PDGF-BB] pg/mL                     | <b>285 (188 - 752)</b>                                  | <b>98.6 (42.9 - 450)</b>  | <b>340 (89.7 - 625)</b>     | <b>&lt;0.0001</b>    |
|                                                           | [TNF- $\alpha$ ] pg/mL              | 67.3 (51.9 - 89.9)                                      | 93.1 (50.7 - 232)         | 83.7 (64.2 - 104)           | 0.1512               |
|                                                           | [VEGF] pg/mL                        | <b>52.7 (52.7 - 64.9)</b>                               | <b>68 (19.7 - 68)</b>     | <b>19.7 (19.7 - 52.7)</b>   | <b>0.0002</b>        |
| Chemoattractant                                           | [Eotaxin] pg/mL                     | 63.1 (42.3 - 99.4)                                      | 44.1 (21.1 - 117)         | 40 (24.1 - 63.1)            | 0.3468               |
|                                                           | [ICAM-1] pg/mL                      | 448 (258 - 682)                                         | 964 (602 - 1972)          | 868 (527 - 1316)            | 0.1654               |
|                                                           | [IL-8] pg/mL                        | <b>7.37 (3.4 - 17.5)</b>                                | <b>65 (18.4 - 620)</b>    | <b>30.7 (15.3 - 49.9)</b>   | <b>&lt;0.0001</b>    |
|                                                           | [IP-10] pg/mL                       | <b>520 (274 - 859)</b>                                  | <b>1421 (302 - 16973)</b> | <b>3487 (985 - 6367)</b>    | <b>0.0080</b>        |
|                                                           | [MCP-1 (MCAF)] pg/mL                | 27.5 (18.5 - 38)                                        | 85.6 (27.6 - 902)         | 79 (30.6 - 273)             | 0.0803               |
|                                                           | [MIP-1 $\alpha$ ] pg/mL             | 1.25 (0.32 - 1.53)                                      | <b>7.91 (2.65 - 32.5)</b> | <b>3.72 (1.86 - 6.9)</b>    | <b>&lt;0.0001</b>    |
|                                                           | [MIP-1 $\beta$ ] pg/mL              | 235 (196 - 266)                                         | 188 (140 - 305)           | 200 (169 - 231)             | 0.7722               |
|                                                           | [RANTES] pg/mL                      | 3.5 (1.49 - 7.41)                                       | 2.05 (0.939 - 5.38)       | 2.13 (0.999 - 3.84)         | 0.9711               |
|                                                           | [VCAM-1] pg/mL                      | <b>1.07 (0.623 - 2.35)</b>                              | <b>3.37 (1.39 - 4.84)</b> | <b>1.71 (1.15 - 4.36)</b>   | <b>0.0263</b>        |
| Hemostasis                                                | [soluble TF] ng/mL                  | <b>46.7 (31 - 74.2)</b>                                 | <b>61.3 (25.1 - 108)</b>  | <b>102 (32.4 - 185)</b>     | <b>0.0257</b>        |
|                                                           | [TFPI] pg/mL                        | 20.8 (15.2 - 36.3)                                      | 38.6 (23.2 - 171)         | 55.9 (19.6 - 80.5)          | 0.6381               |
|                                                           | [PAI-1] ng/mL                       | <b>28 (12.8 - 61)</b>                                   | <b>97.5 (40.6 - 191)</b>  | <b>64 (37.3 - 78.1)</b>     | <b>0.0282</b>        |
|                                                           | [t-PA] ng/mL                        | <b>3.49 (1.85 - 6.08)</b>                               | <b>13.6 (6.5 - 52.4)</b>  | <b>10.3 (6.34 - 22.6)</b>   | <b>0.0234</b>        |
|                                                           | [sTLT-1] ng/mL                      | <b>0.679 (0.0482 - 7.18)</b>                            | <b>1.24 (0.356 - 6.5)</b> | <b>0.654 (0.127 - 1.35)</b> | <b>&lt;0.0001</b>    |
|                                                           | [sCD62P] ng/mL                      | 39.5 (27.8 - 56.1)                                      | 58.5 (38.9 - 112)         | 47.8 (25.4 - 87.6)          | 0.1226               |
| Cells                                                     | Platelets 10 <sup>3</sup> / $\mu$ L | <b>241 (162 - 357)</b>                                  | <b>180 (50.4 - 409)</b>   | <b>256 (119 - 443)</b>      | <b>0.0241</b>        |

|  |                                      |                                  |                           |                        |               |
|--|--------------------------------------|----------------------------------|---------------------------|------------------------|---------------|
|  | <b>Neutrophils 10<sup>3</sup>/μL</b> | <b><i>4.34 (2.37 - 6.35)</i></b> | <b>14.2 (5.11 - 29.9)</b> | <b>7.61 (4 - 12.3)</b> | <b>0.0025</b> |
|  | Lymphocytes 10 <sup>3</sup> /μL      | <i>1905 (1022 - 2967)</i>        | 585 (202 - 1444)          | 910 (451 - 1297)       | 0.0686        |

‡ Comparison between sepsis and COVID-19 groups has been done according to an ordinary two-way ANOVA with uncorrected Fischer's significant difference multiple comparison on log-transformed data.

*Abbreviations:* A full list of abbreviation is available in supplementary table S3

**Supplementary Table S3: List of abbreviations of cytokines, hemostasis, nucleosomes and neutrophil activation markers.**

| <b>Abbreviation</b>     | <b>Name of the biomarker</b>                                               |
|-------------------------|----------------------------------------------------------------------------|
| CCL-11                  | Eotaxin                                                                    |
| Cit-H3 (R2, R8 and R17) | Citrullinated histone H3                                                   |
| FGF basic               | Basic fibroblast growth factor                                             |
| G-CSF                   | Granulocyte colony-stimulating factor                                      |
| GM-CSF                  | Granulocyte-macrophage colony-stimulating factor                           |
| ICAM                    | Intercellular adhesion molecule                                            |
| IL-10                   | Interleukin 10                                                             |
| IL-12 (p70)             | Interleukin 12                                                             |
| IL-13                   | Interleukin 13                                                             |
| IL-15                   | Interleukin 15                                                             |
| IL-17                   | Interleukin 17                                                             |
| IL-1ra                  | Interleukin 1 receptor antagonist                                          |
| IL-1 $\beta$            | Interleukin 1 $\beta$                                                      |
| IL-2                    | Interleukin 2                                                              |
| IL-4                    | Interleukin 4                                                              |
| IL-5                    | Interleukin 5                                                              |
| IL-6                    | Interleukin 6                                                              |
| IL-7                    | Interleukin 7                                                              |
| IL-8                    | Interleukin 8                                                              |
| IL-9                    | Interleukin 9                                                              |
| INF- $\gamma$           | Interferon $\gamma$                                                        |
| IP-10                   | Interferon $\gamma$ induced protein 10                                     |
| MCP-1                   | Monocyte chemoattractant protein 1                                         |
| MIP-1 $\alpha$          | Macrophage Inflammatory Protein-1 $\alpha$                                 |
| MIP-1 $\beta$           | Macrophage Inflammatory Protein-1 $\beta$                                  |
| MPO                     | Myeloperoxidase                                                            |
| NE                      | Neutrophil elastase                                                        |
| Nu.H3.1                 | H3.1-Nucleosome                                                            |
| Nu.H3R8                 | Citrullinated histone H3R8-Nucleosome                                      |
| PAI-1                   | Plasminogen activator inhibitor type 1                                     |
| PDGF-bb                 | Platelet-derived growth factor BB                                          |
| RANTES                  | Regulated upon Activation, Normal T Cell Expressed and Presumably Secreted |
| sCD62P                  | Soluble P-selectin                                                         |
| Soluble TF              | Soluble tissue factor                                                      |
| sTLT-1                  | Soluble TREM-like transcript-1                                             |
| sTREM-1                 | Triggering receptor expressed on myeloid cells-1                           |
| t-PA                    | Tissue plasminogen activator                                               |
| TFPI                    | Tissue factor pathway inhibitor                                            |
| TNF- $\alpha$           | Tumor necrosis factor $\alpha$                                             |
| VCAM                    | Vascular cell adhesion molecule                                            |
| VEGF                    | Vascular endothelial growth factor                                         |

Supplementary Figure S1: Heatmap of cytokine, hemostasis, nucleosome and neutrophil activation markers in controls, septic shock and critical COVID-19 patients.

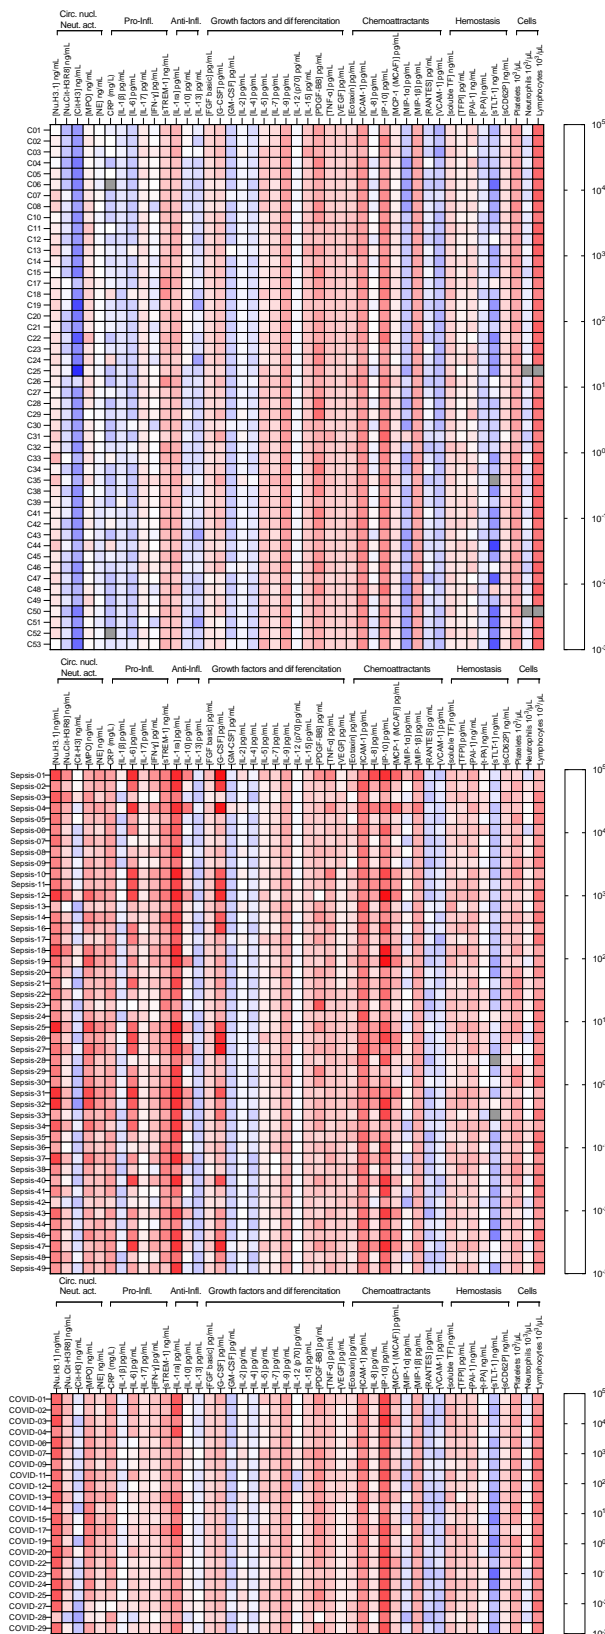

**Supplementary Figure S2: Correlation matrix of all parameters reported in this study in controls, septic shock and critical COVID-19 cohorts.** Parameters showing a correlation above 0.7 in both cohorts (septic shock and critical COVID-19 patients) are marked in bold. No correlations below  $-0.7$  were found.

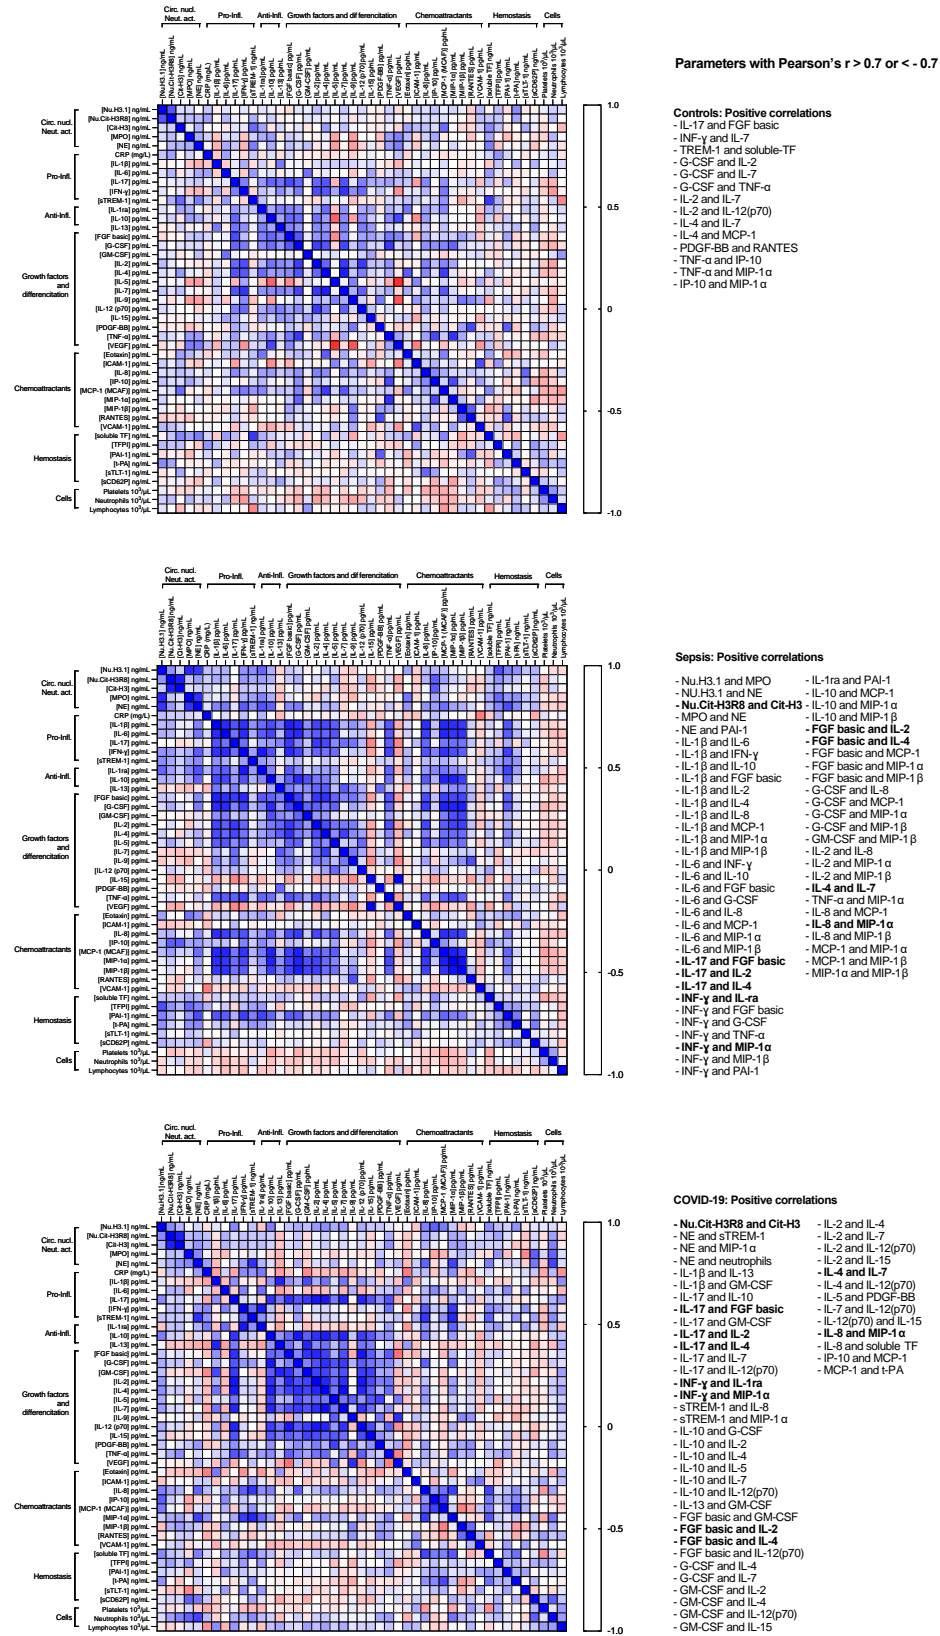

Supplementary Figure S3: Correlation between Nu.H3.1 and APACHE-II and SOFA scores in septic shock and critical COVID-19 patients.

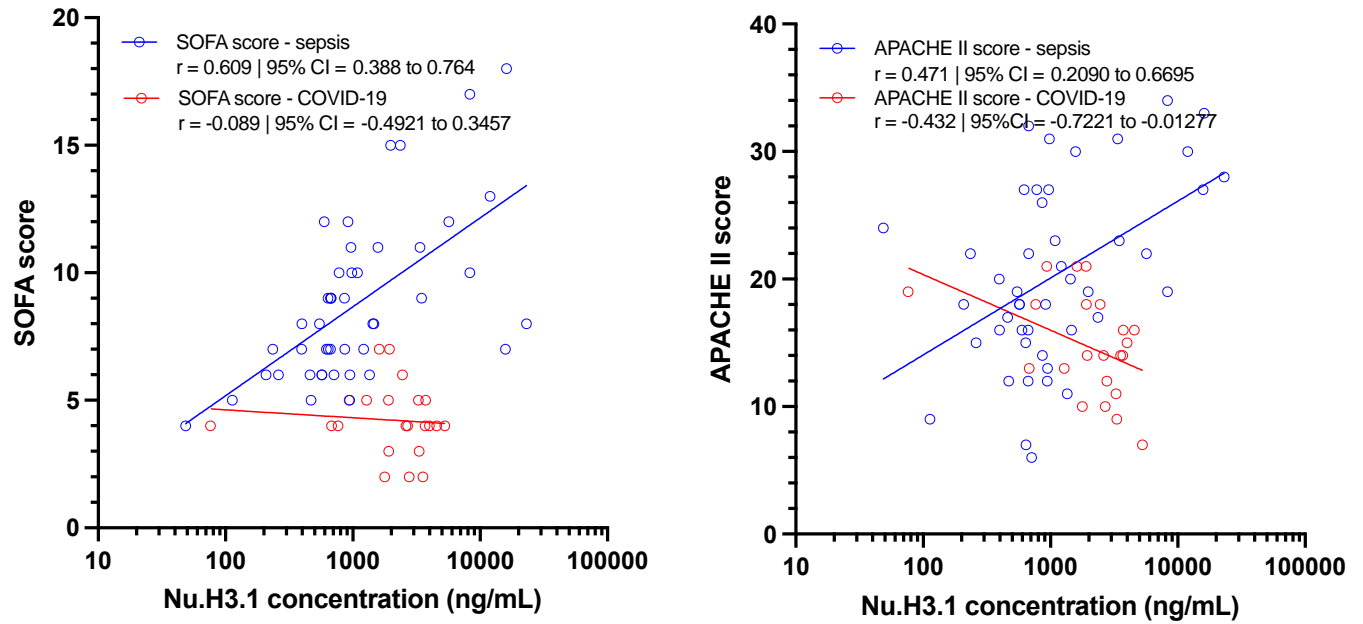



Supplementary Figure S4: Correlation between NE and Nu.H3.1 in septic shock and critical COVID-19 patients.

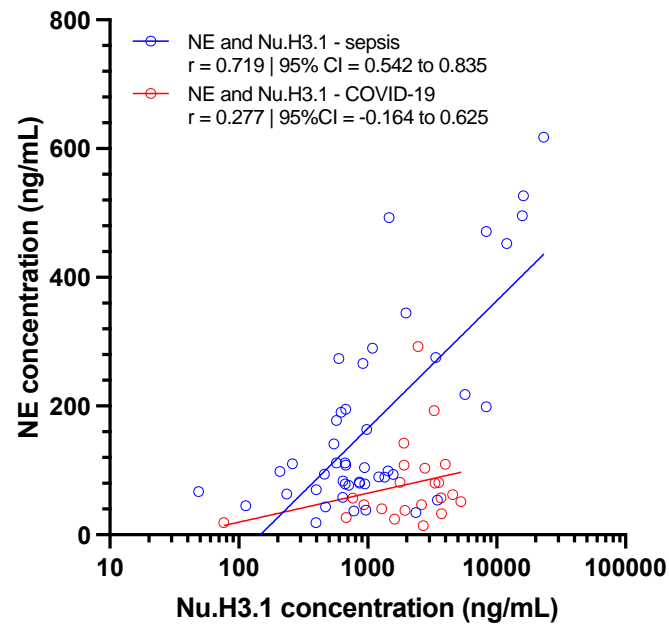

Supplement: s1 [file s1]
